# Supplementary material for: Long-Term Cardiac Sequelae in Patients Referred into a Diagnostic Post-COVID-19 Pathway: The Different Impacts on the Right and Left Ventricles
Source: Diagnostics (Basel). 2021 Nov 6;11(11):2059. doi: 10.3390/diagnostics11112059 (PMC8623572; doi:10.3390/diagnostics11112059)
Supplement: Supplementary file 1 [file diagnostics-11-02059-s001.zip › diagnostics-1392080-supplementary.pdf]

## Supplementary Results and Tables

Regarding laboratory data, CRP and D-dimer were markedly increased, transaminases slightly increased and creatinine was in the normal range (Table S2).

The pharmacological treatment consisted of Antibiotics (90%), Hydroxychloroquine (72%), Colchicine (14%), Antivirals (lopinavir/ritonavir or darunavir/cobicistat) (49%), Biologics (Tocilizumab or Sarilumab, 10%), Systemic corticosteroids (41%), Low Molecular Weight Heparin (LMWH) in a prophylactic dose (52%), and LMWH in anticoagulant dose (19%) (Table S3).

ECG showed repolarization abnormalities such as ST depression in 24% patients, right intraventricular conduction disturbances in 8%, and 6% showed arrhythmias at follow-up. PR, QRS and QTc intervals were in the normal range (Table S4).

**Table S1. COVID-19 severity in hospitalized patients**

| Variable                                  | Total<br>117(73) |
|-------------------------------------------|------------------|
| Chest CT visual score                     | 44 ± 21          |
| Length of hospital stay (days)            | 20.0 (9.0-37.5)  |
| Length of Intensive Care Unit stay (days) | 45.0 (37.5-75.5) |
| Ordinary regime admissions (n,%)          | 99 (85)          |
| Intensive Care Unit admissions (n,%)      | 17 (15)          |
| Oxygen therapy (n,%)                      | 104 (89)         |
| Mask (n,%)                                | 69 (66)          |
| Noninvasive ventilation (n,%)             | 20 (18)          |
| Invasive mechanical ventilation (n,%)     | 15 (14)          |
| <b>CV Complications</b>                   |                  |
| Angina (n,%)                              | 5 (3)            |
| Arrhythmia (n,%)                          | 16 (10)          |
| Myocarditis (n,%)                         | -                |
| Pericarditis (n,%)                        | 1 (1)            |
| DVT (n,%)                                 | 3 (2)            |
| VTE (n,%)                                 | 12 (8)           |
| Hemodynamic instability (n,%)             | 11 (7)           |

**Legend:** data are expressed as mean ± standard deviation, median (IQ range) or number of subjects with corresponding percentage. CV, cardiovascular; DVT, deep vein thrombosis; VTE, venous thromboembolism. Chest CT visual score in the total population

**Table S2. Laboratory data**

| Parameters         | Total                   | Normal range |
|--------------------|-------------------------|--------------|
| CRP (mg/dL)        | 104 (37-164) (104)      | 0.001-5.000  |
| D-dimer (ng/mL)    | 864 (495-1703)<br>(107) | <500         |
| AST (U/L)          | 43 (31-65)<br>(108)     | 0-40         |
| ALT (U/L)          | 37 (25-53)<br>(109)     | 0-40         |
| Creatinine (mg/dL) | 0.8 (0.7-1.1)<br>(110)  | 0.5-1.4      |

**Legend.** Data are expressed as median (IQ range). In brackets, the number of subjects in which the parameter was available. Alanine transaminase, ALT; AST, aspartate transaminase; CRP, C-reactive protein.

**Table S3. COVID-19 Therapy**

| Variable                                                                   | Total    |
|----------------------------------------------------------------------------|----------|
| Antibiotics (n,%)                                                          | 144 (90) |
| Hydroxychloroquine (n,%)                                                   | 115 (72) |
| Colchicine (n,%)                                                           | 22 (14)  |
| Antivirals<br>( <i>lopinavir/ritonavir or darunavir/cobicistat</i> ) (n,%) | 78 (49)  |
| Biologics<br>( <i>Tocilizumab or Sarilumab</i> ) (n,%)                     | 16 (10)  |
| Systemic corticosteroids (n,%)                                             | 65 (41)  |
| LMWH - prophylactic dose (n,%)                                             | 83 (52)  |
| LMWH - therapeutic dose (n,%)                                              | 30 (19)  |

**Legend.** Data are expressed as number of subjects with corresponding percentage

**Table S4. ECG findings in total COVID-19 population**

| Parameters                    | Total n=160 |
|-------------------------------|-------------|
| PR interval (ms)              | 154 ± 28    |
| Atrial Fibrillation (n)       | 2% (3/160)  |
| QRS complex duration (ms)     | 85 ± 14     |
| Right bundle branch block (n) |             |
| • Incomplete                  | 4%(6/160)   |

|                                      |             |
|--------------------------------------|-------------|
| • Complete                           | 4%(7/160)   |
| QTc interval (ms)                    | 393 ± 30    |
| ST segment depression (n)            | 24%(38/160) |
| Supraventricular premature beats (n) | 3%(5/160)   |
| Ventricular premature beats (n)      | 3%(4/160)   |

**Legend.** Data are expressed as mean values ± standard deviation or percentage.
